# Supplementary material for: Detection of genetic divergence among some wheat (Triticum aestivum L.) genotypes using molecular and biochemical indicators under salinity stress
Source: PubMed Central journal article supplement (PMC8007010; doi:10.1371/journal.pone.0248890), 2021-03-29

**Fig. 5**

**A** C1 T1 T2 C2 T1 T2 C3 T1 T2 C4 T1 T2 C5 T1 T2 C6 T1 T2 C7 T1 T2 C8 T1 T2

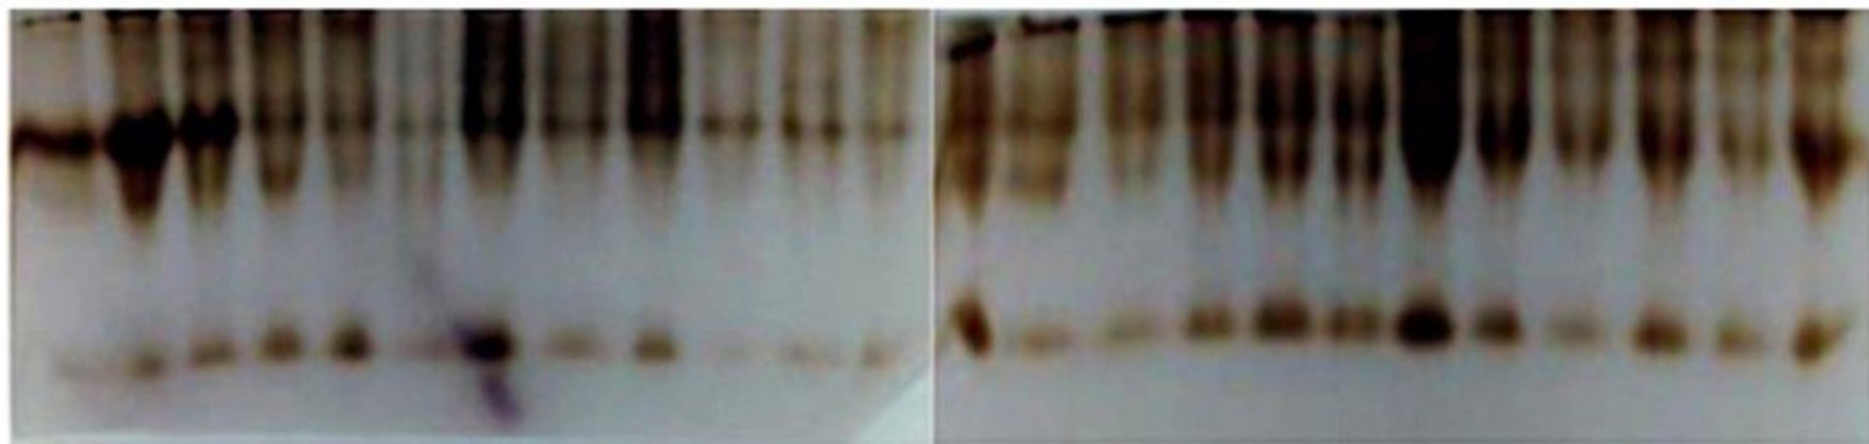

**B** C1 T1 T2 C2 T1 T2 C3 T1 T2 C4 T1 T2 C5 T1 T2 C6 T1 T2 C7 T1 T2 C8 T1 T2

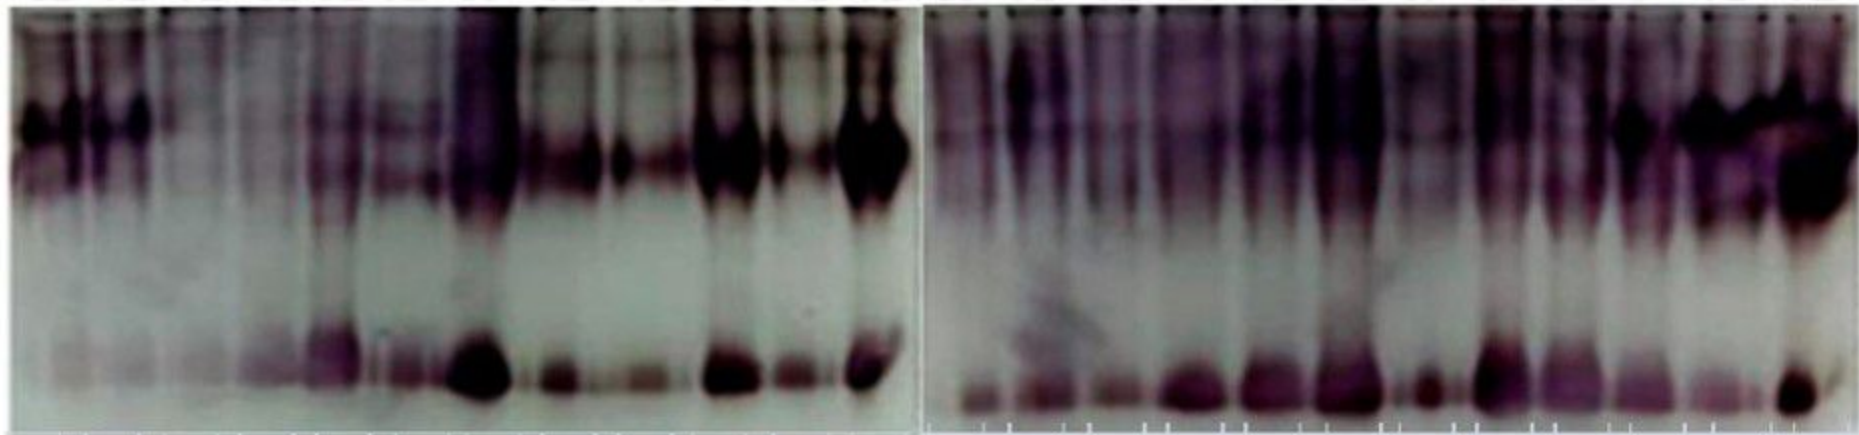

**Figure 5 A left**

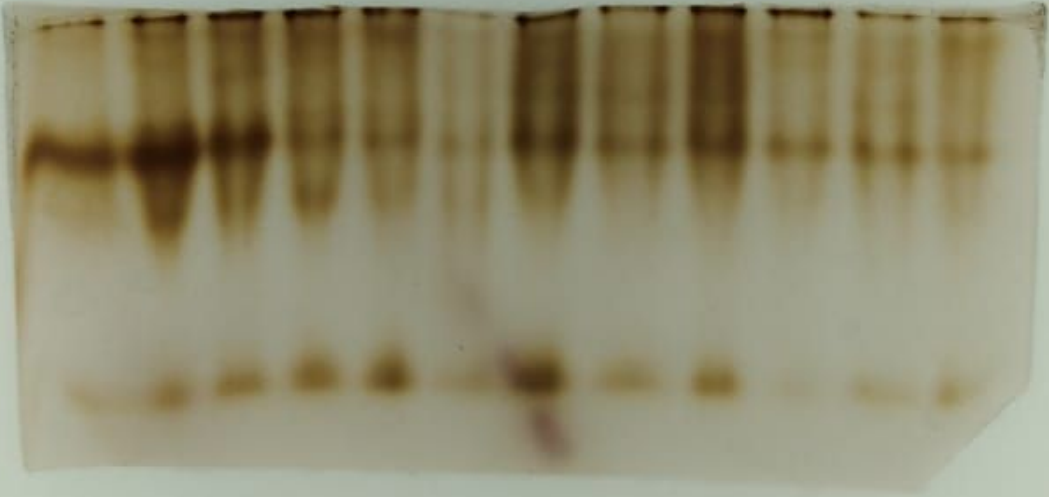

**Figure 5 A right**

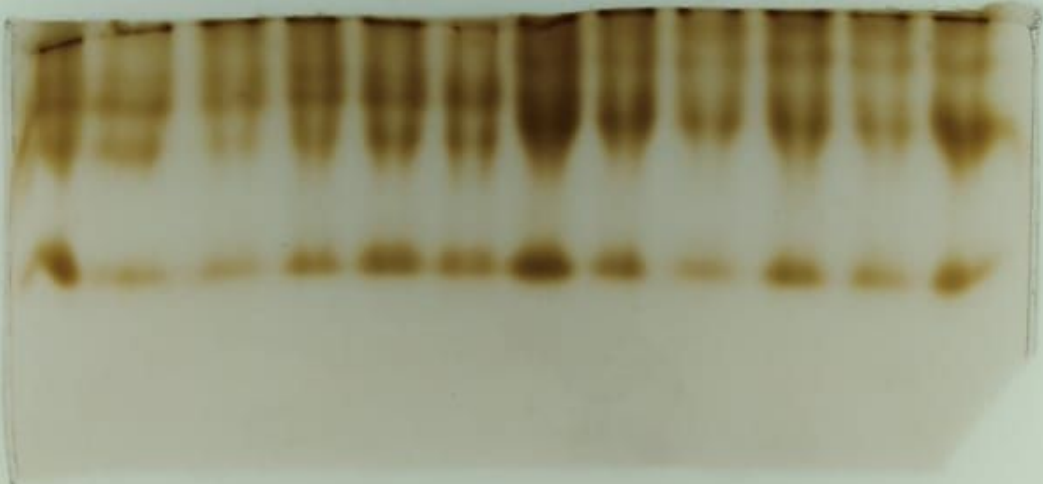

**Figure 5 B left**

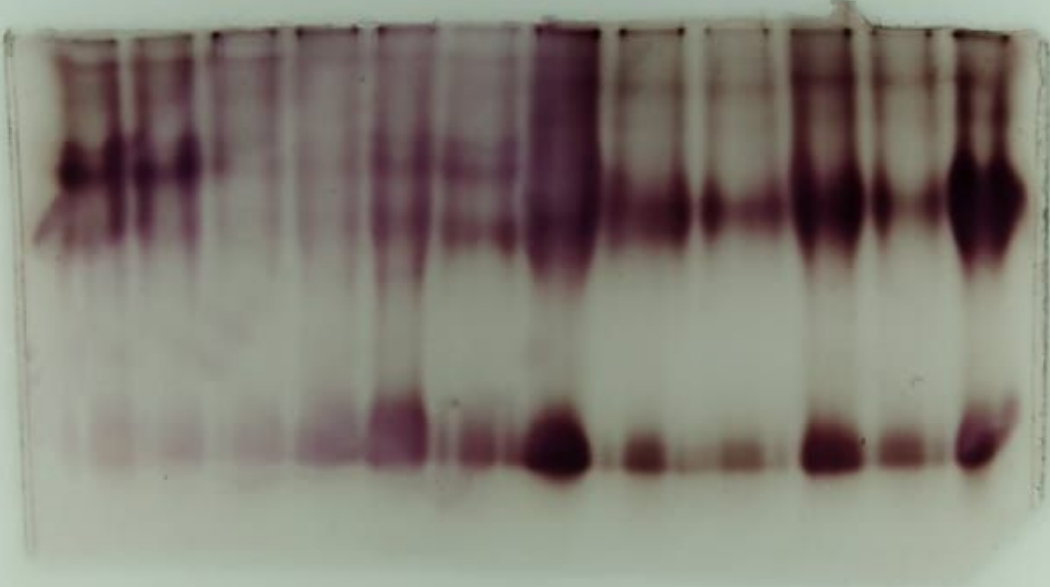

**Figure 5 B right**

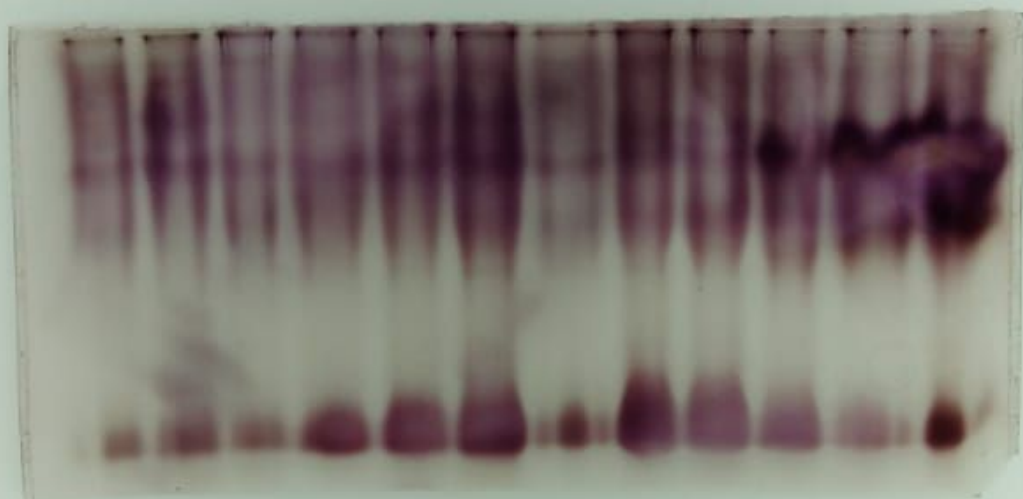

S1 Fig.

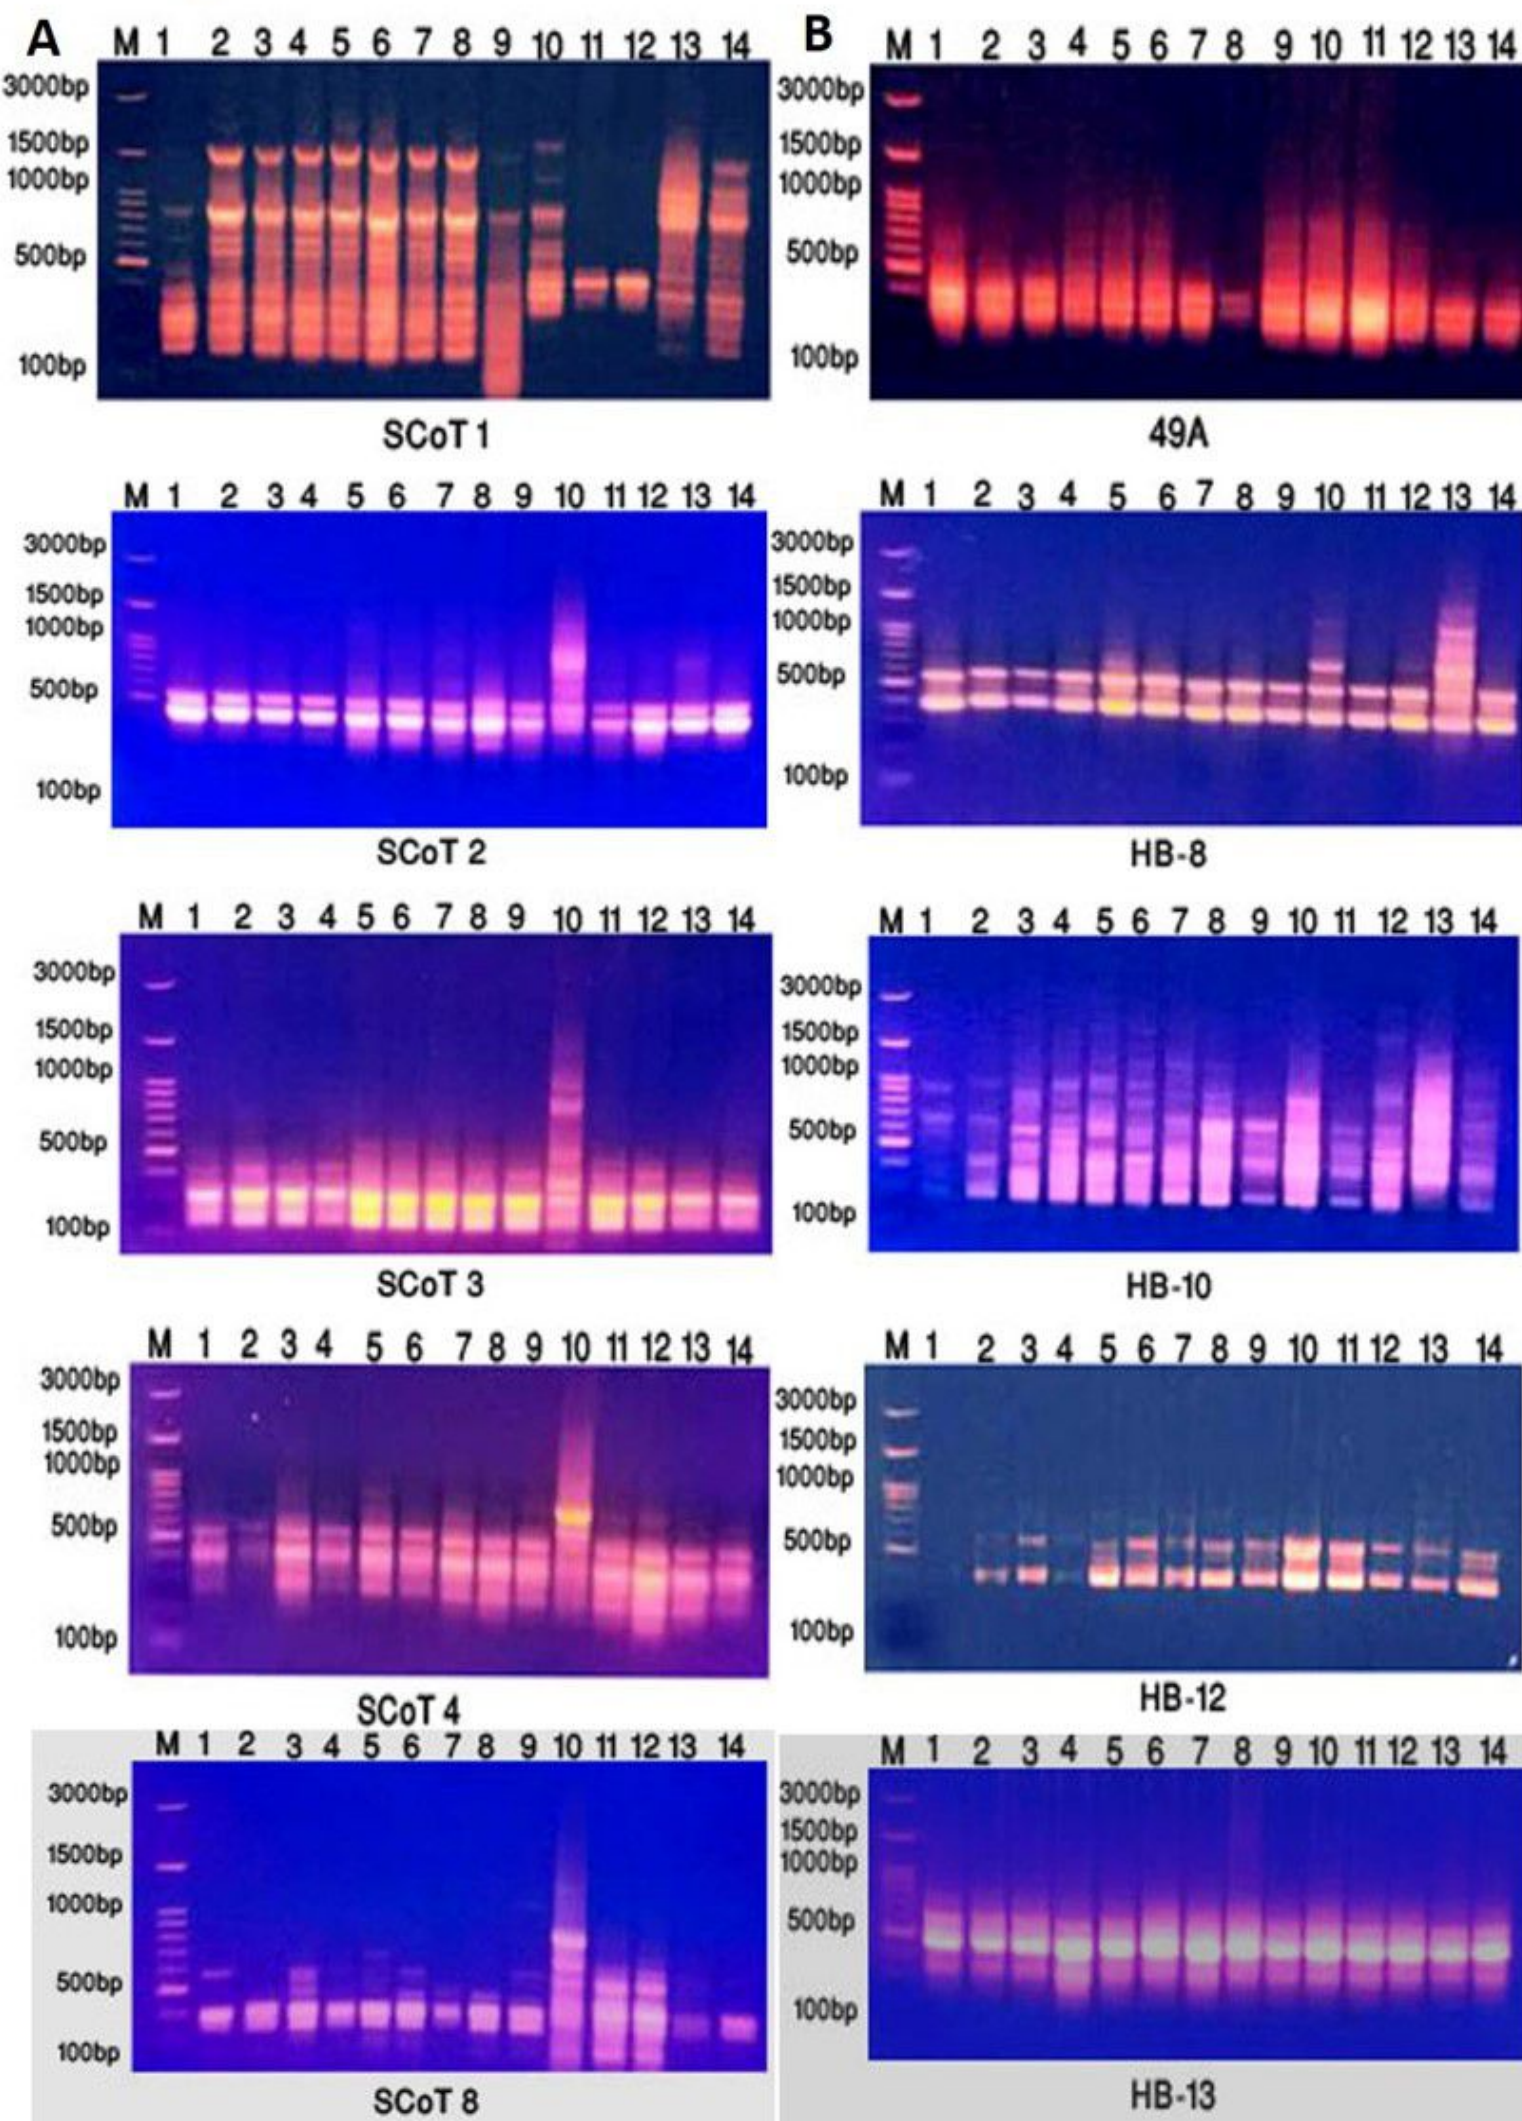

49 A

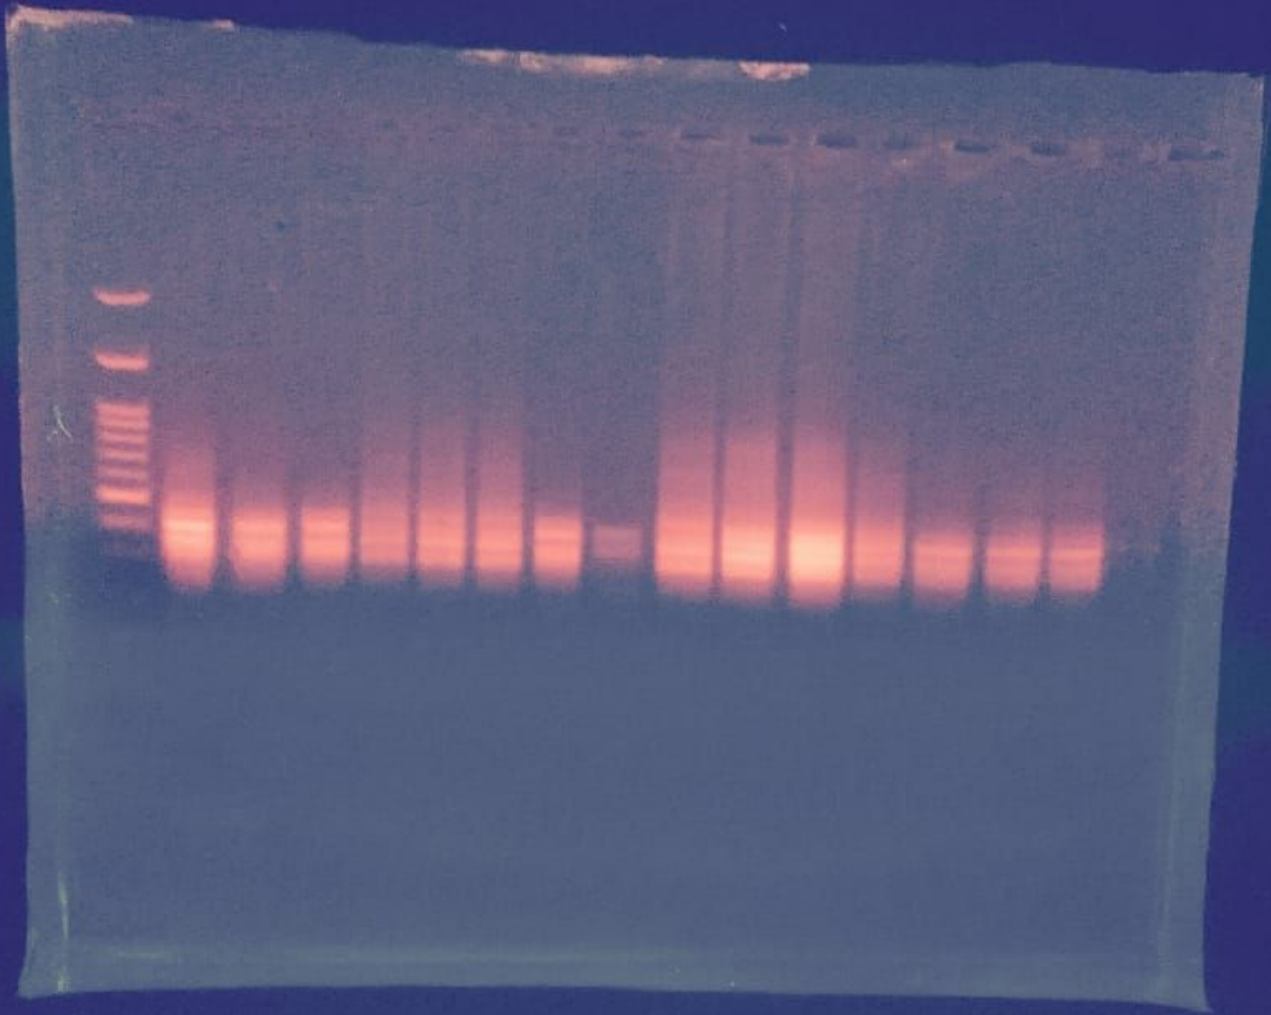

HB-08

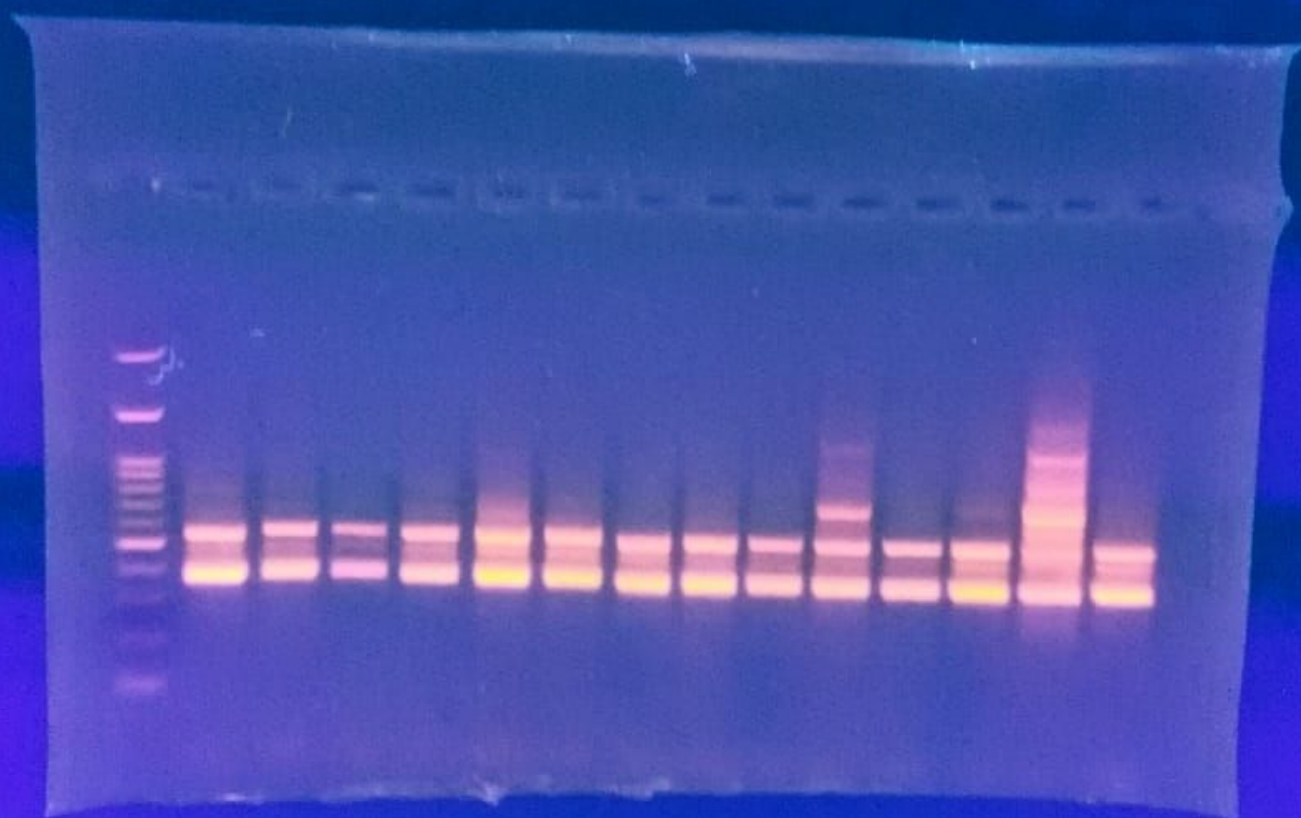



HB-10

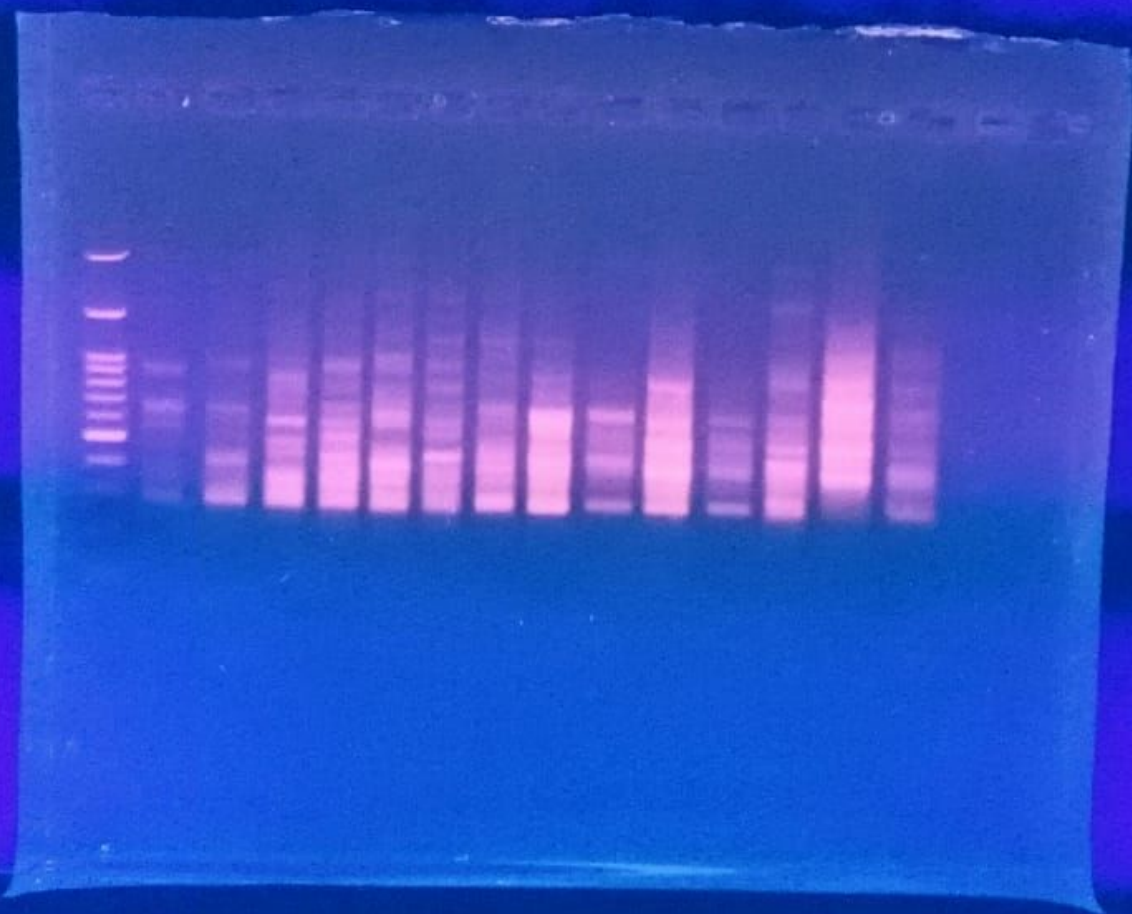

HB-12

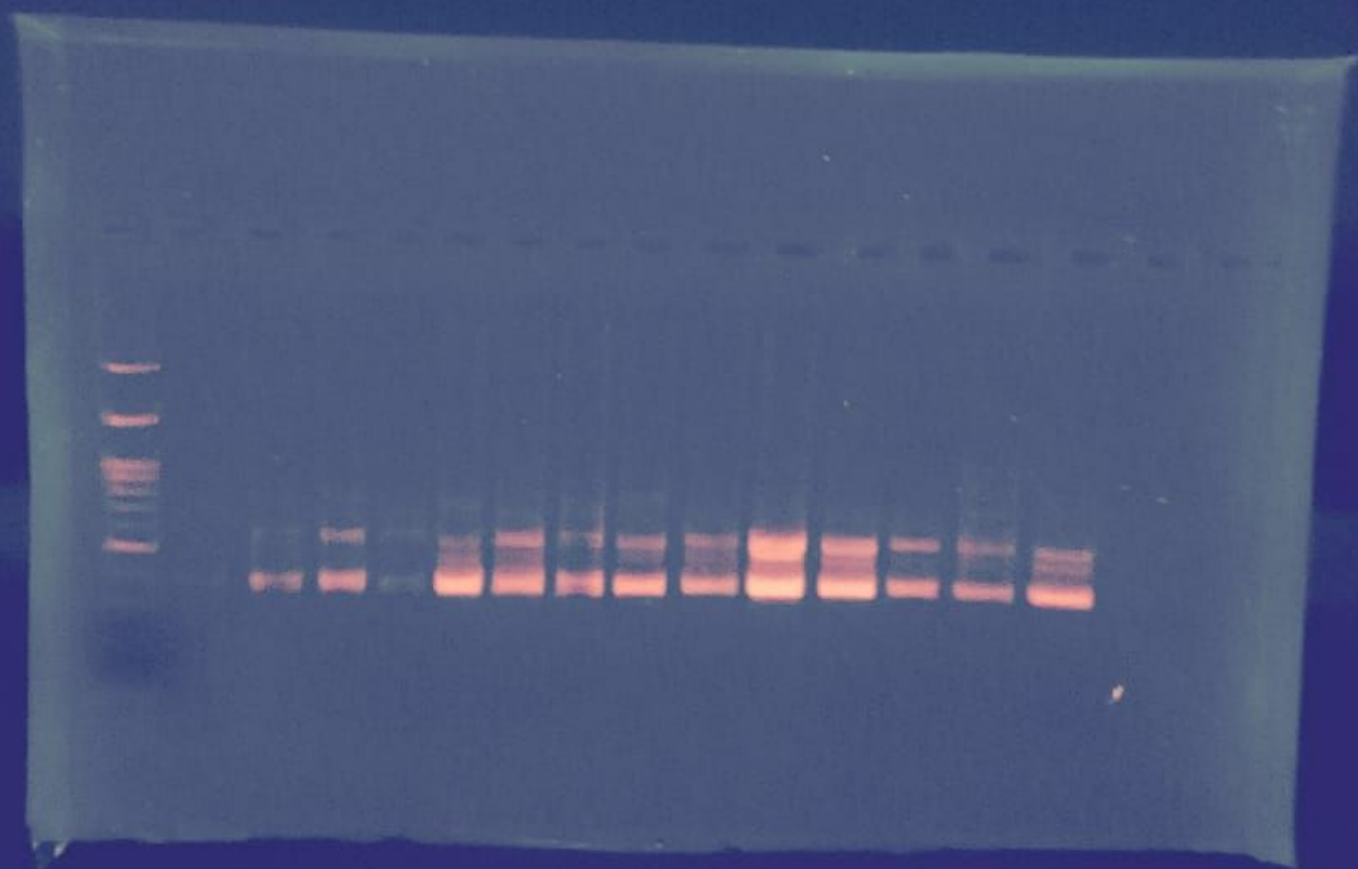

HB-13

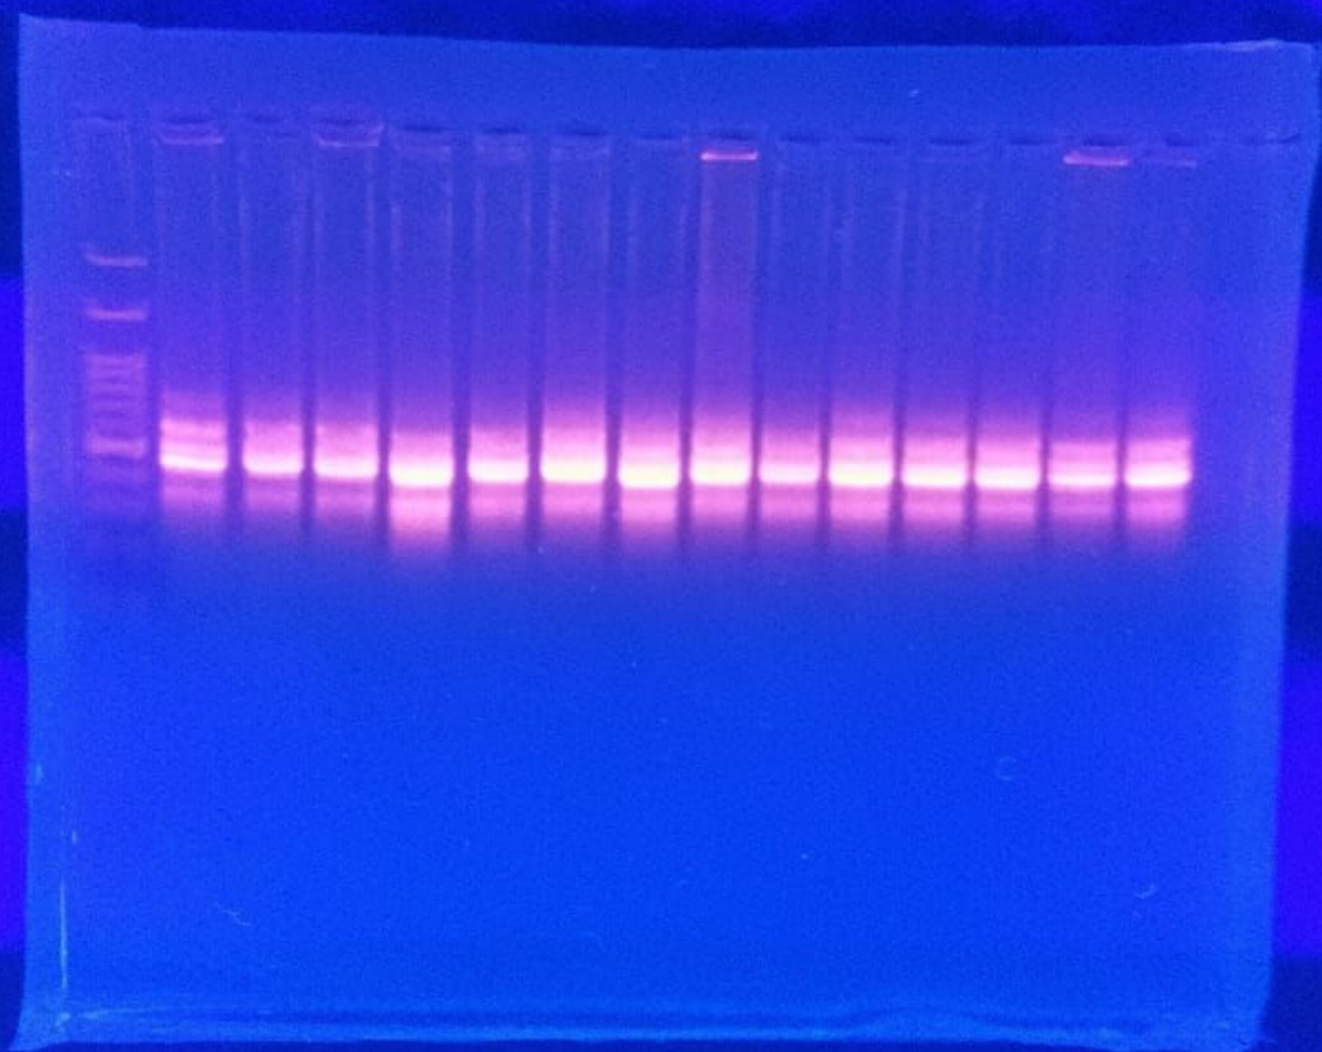

# SCoT 1

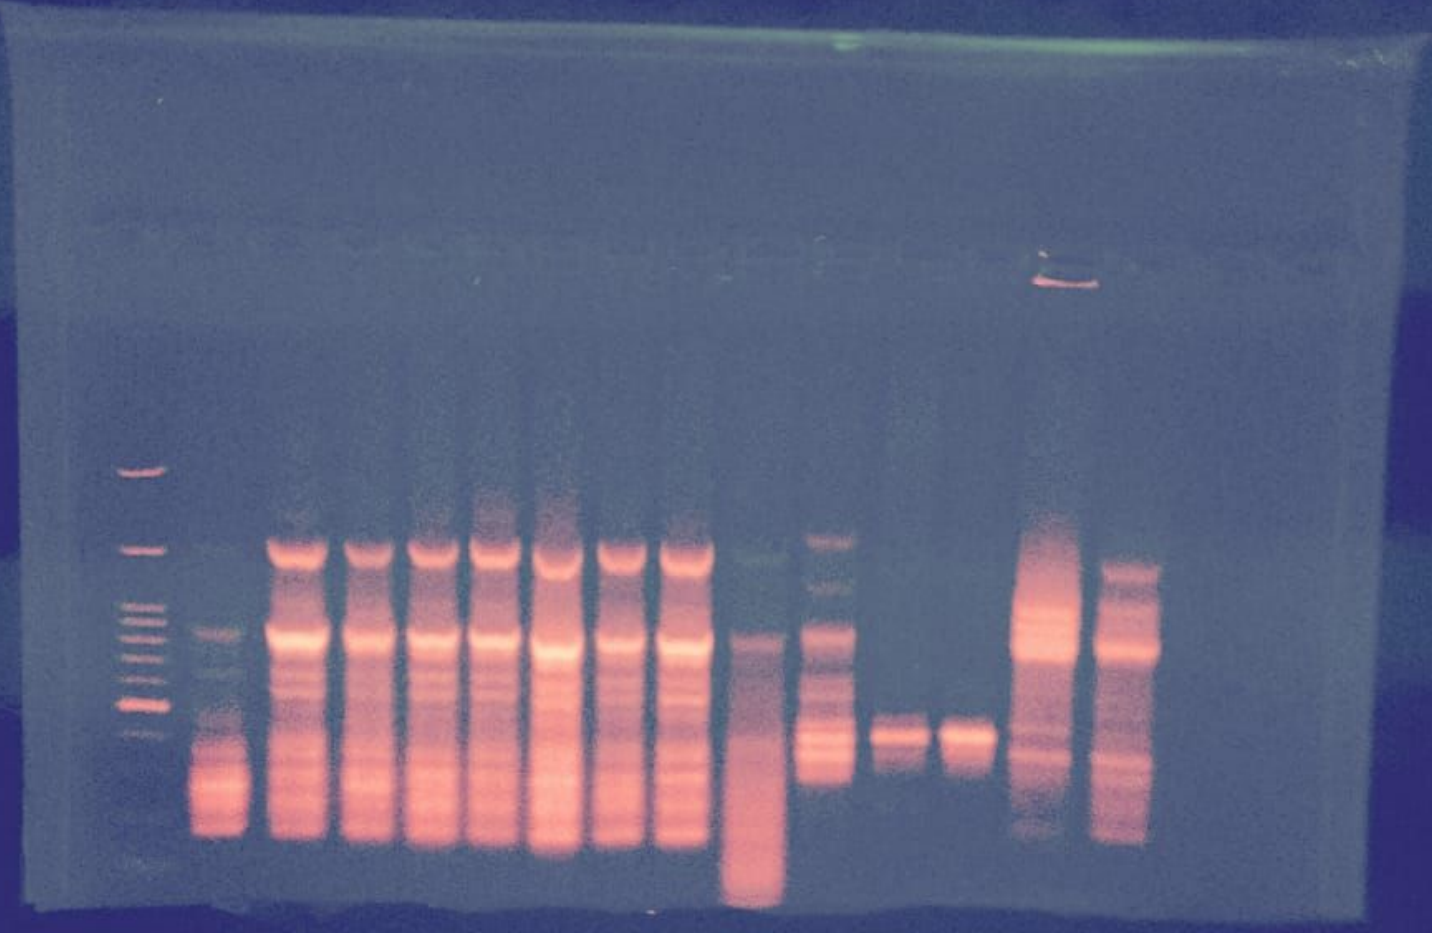

# SCoT 2

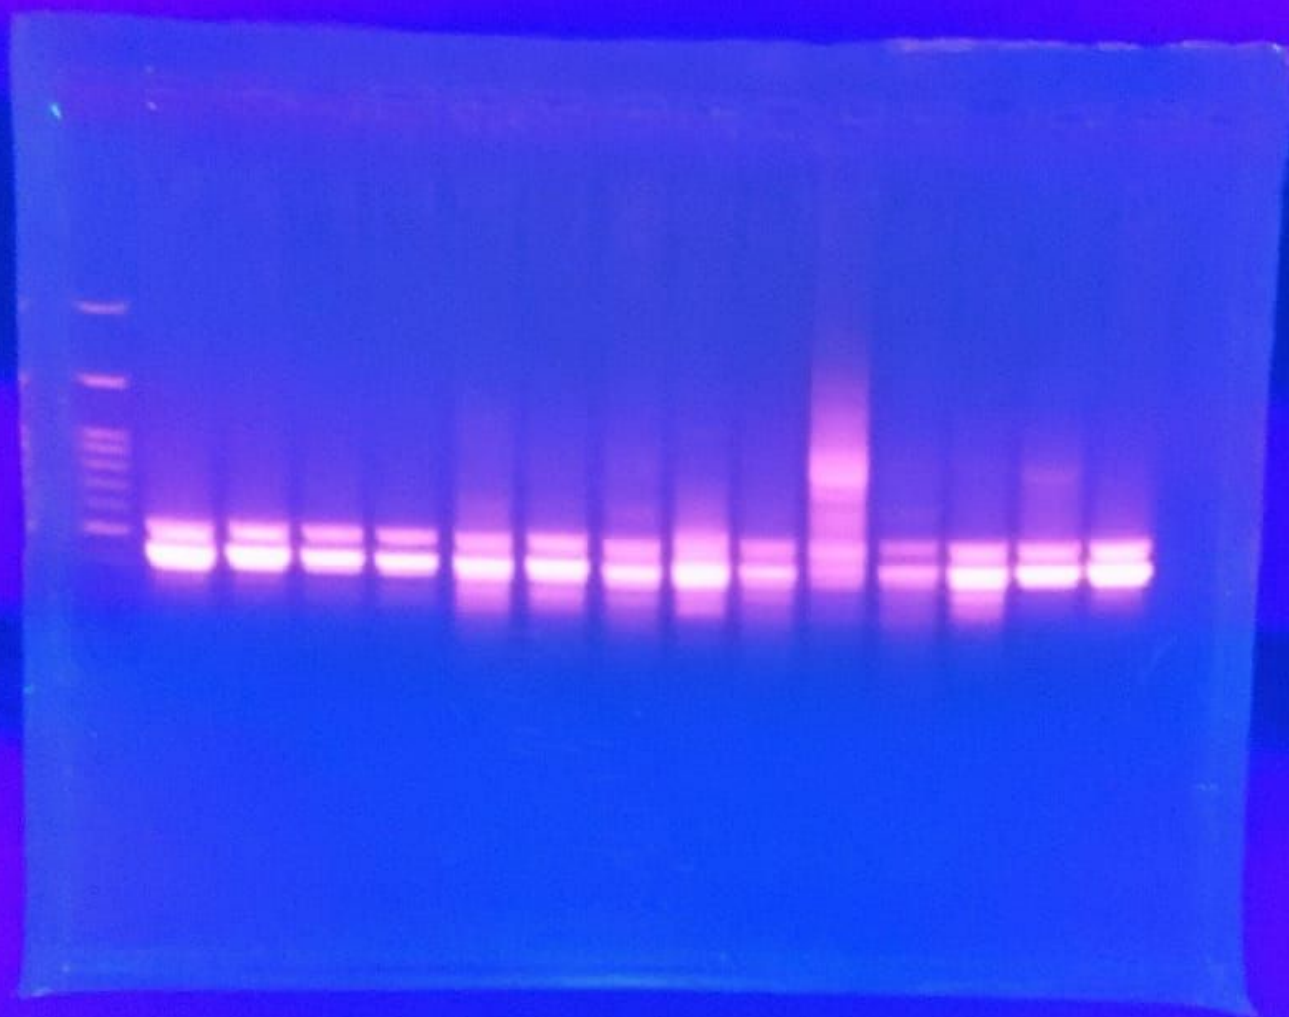

SCoT 3

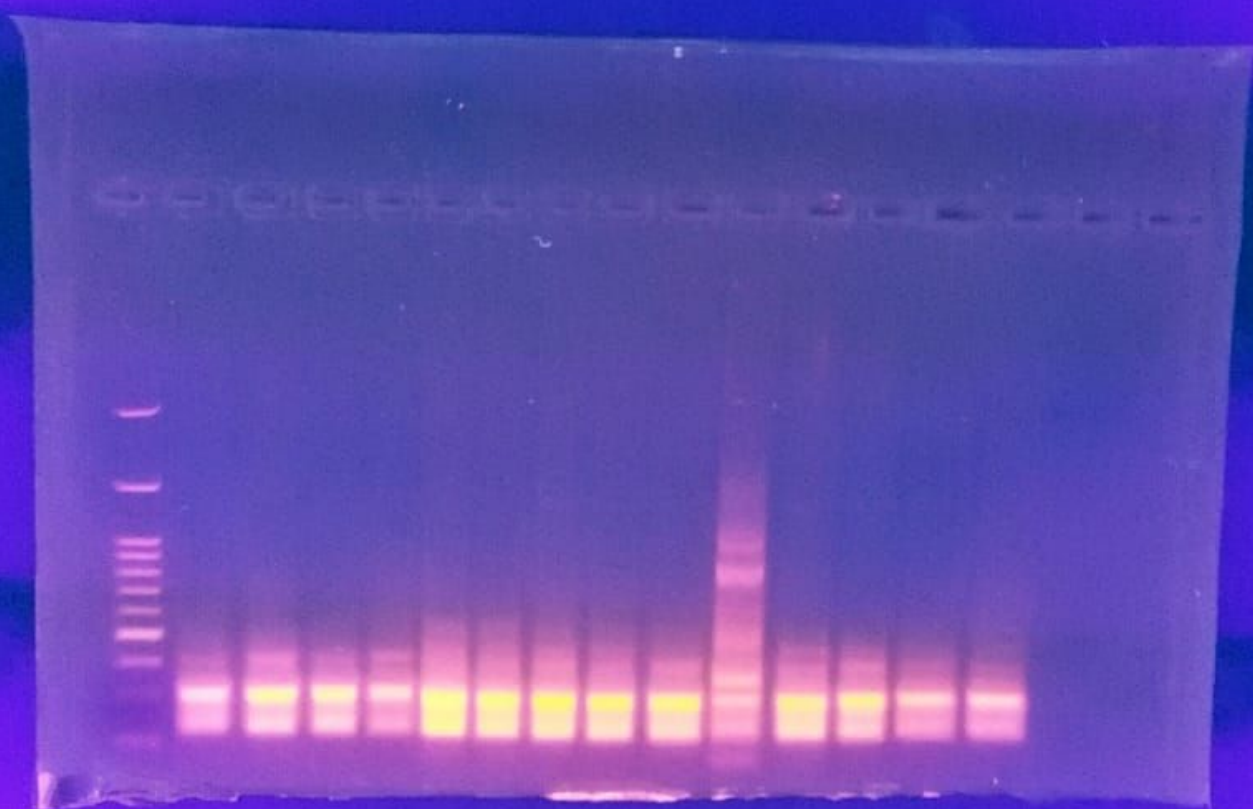

SCoT 4

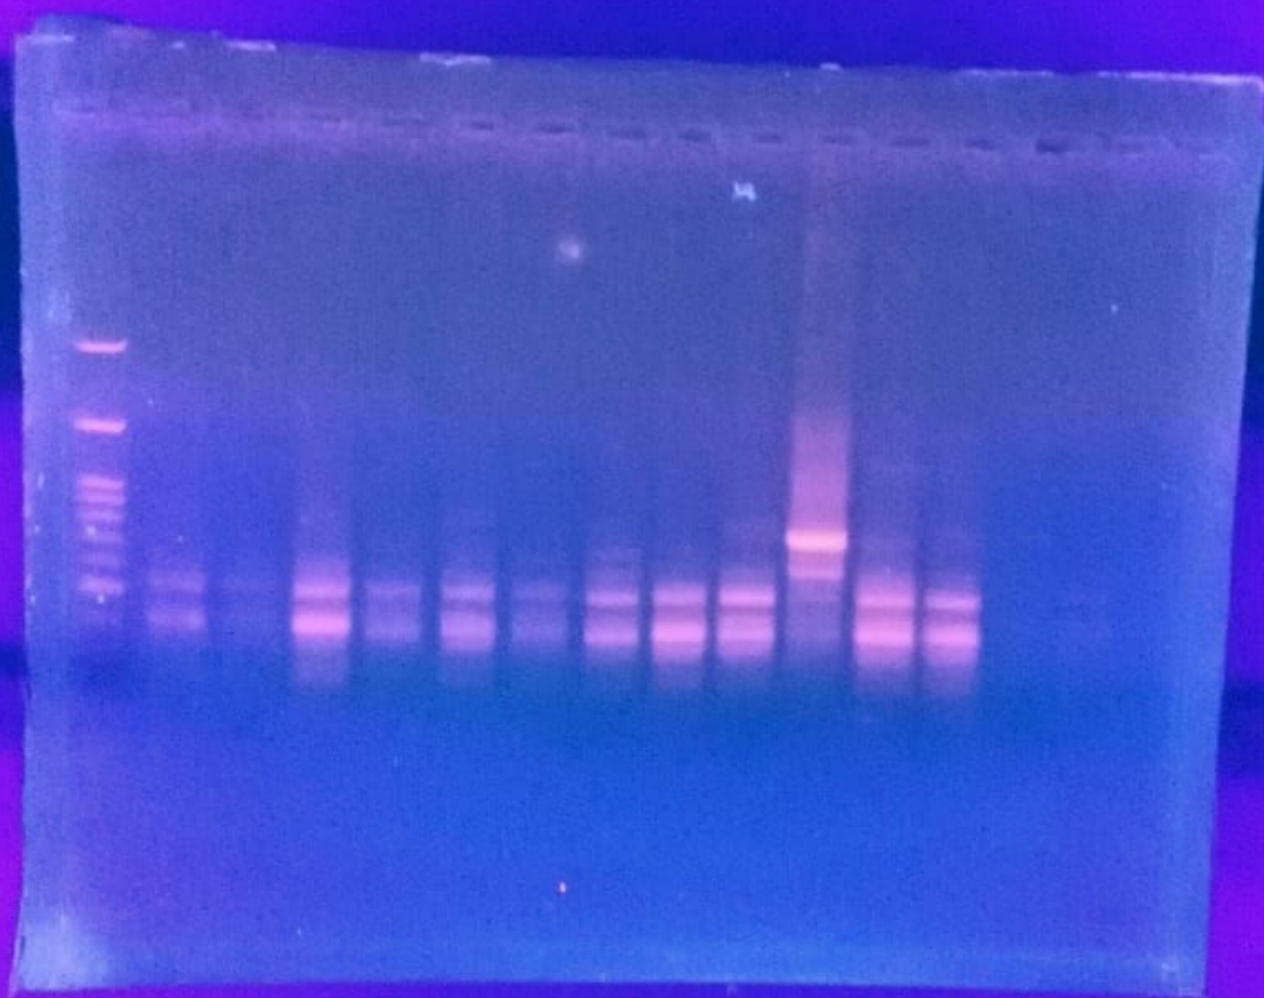

# SCoT 8

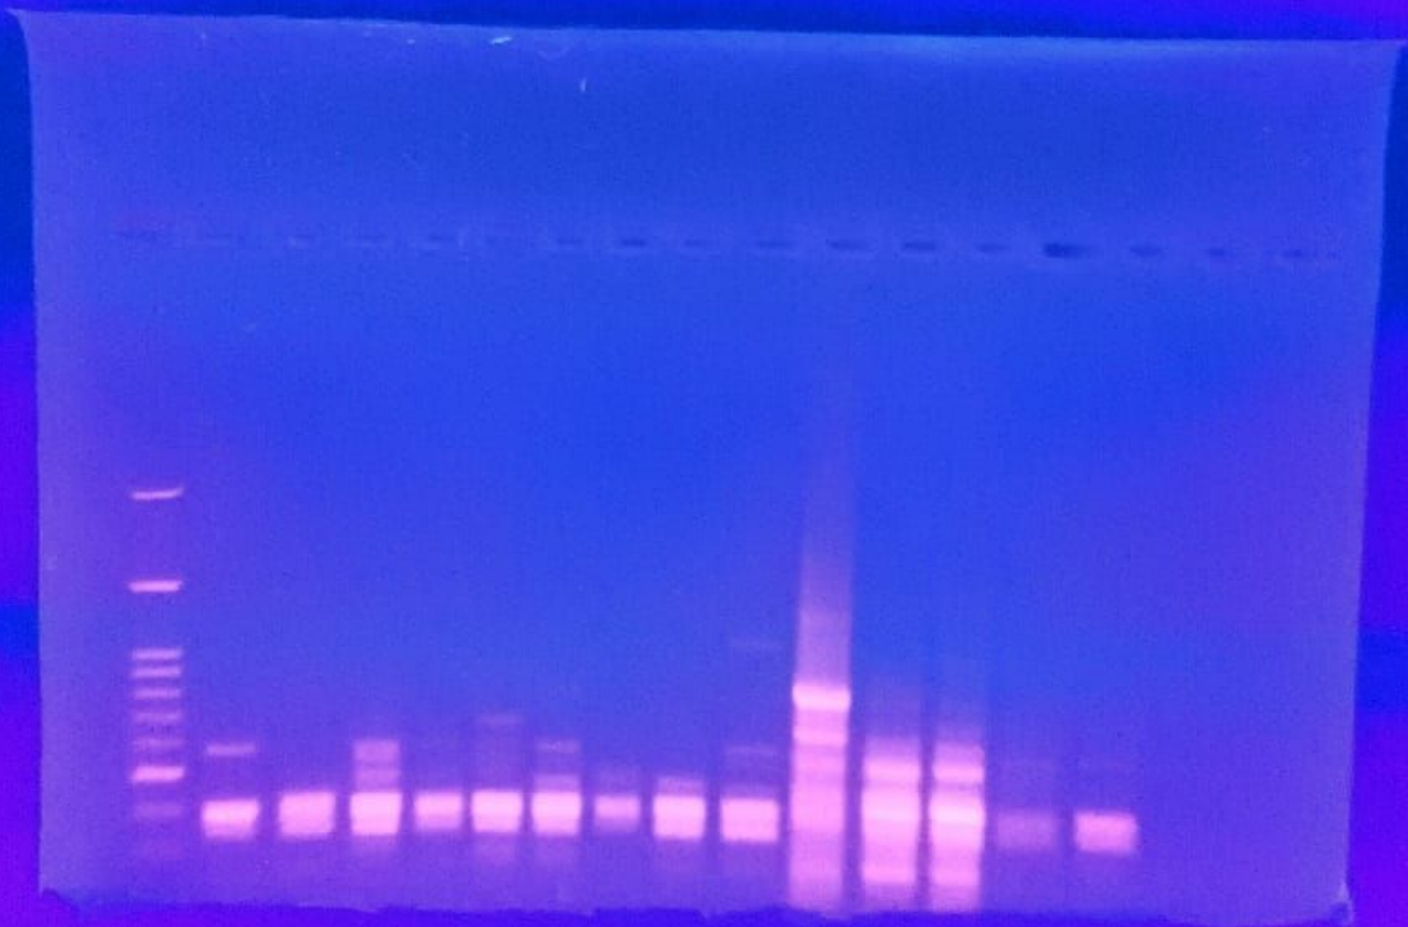

Supplement: pone.0248890.s009.pdf [file pone.0248890.s009.pdf]
